# Supplementary material for: Identification of cancer/testis antigen 2 gene as a potential hepatocellular carcinoma therapeutic target by hub gene screening with topological analysis
Source: PubMed Central journal article supplement — Oncol Lett. 2019 Sep 5;18(5):4778–88. doi: 10.3892/ol.2019.10811 (PMC6781590; doi:10.3892/ol.2019.10811), 2019-09-05
Supplement: Supplementary_Data.pdf [file Supplementary_Data.pdf]

Figure S1. ROC curve analysis of cancer/testis antigen 2 expression. The ROC curve analysis with respect to AFP expression level was used to determine the cut-point of the immunoreactive score. ROC, receiver operating characteristic; AFP,  $\alpha$ -fetoprotein.

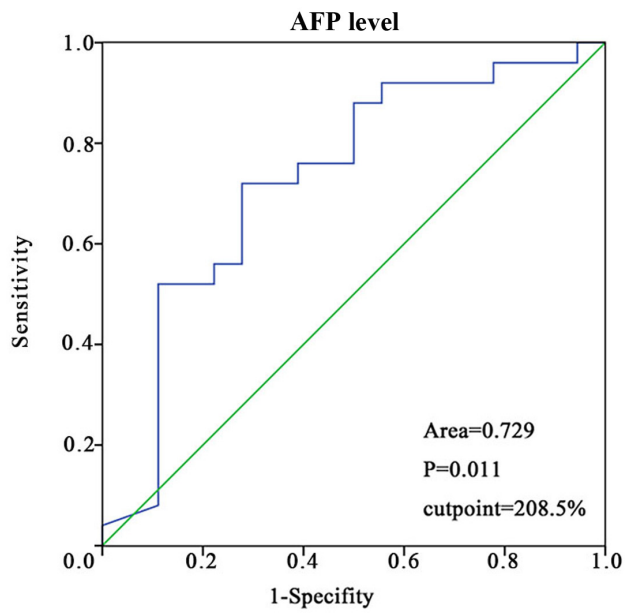

Table SI. Clinicopathological features of patients with hepatocellular carcinoma from The Cancer Genome Atlas.

| Features   | Categories          | Number, n | Percent, % |
|------------|---------------------|-----------|------------|
| Sex        | Female              | 121       | 32.6       |
|            | Male                | 250       | 67.4       |
| Age, years | <60                 | 169       | 45.7       |
|            | ≥60                 | 201       | 54.3       |
| T stage    | 1                   | 181       | 49.2       |
|            | 2                   | 94        | 25.6       |
|            | 3                   | 80        | 21.7       |
|            | 4                   | 13        | 3.5        |
| TNM stage  | 1                   | 171       | 49.3       |
|            | 2-4                 | 176       | 50.7       |
| AFP        | Low (<upper limit)  | 120       | 43.2       |
|            | High (≥upper limit) | 158       | 56.8       |

T, tumor; TNM, tumor-Node-Metastasis; AFP,  $\alpha$ -fetoprotein.

Table SII. Clinicopathological features of patients with hepatocellular carcinoma from The First Affiliated Hospital of China Medical University.

| Features              | Categories     | Number, n | Percent, % |
|-----------------------|----------------|-----------|------------|
| Sex                   | Female         | 8         | 17.4       |
|                       | Male           | 38        | 82.6       |
| Age, years            | <60            | 34        | 73.9       |
|                       | ≥60            | 12        | 26.1       |
| T stage               | 1-2            | 28        | 65.1       |
|                       | 3-4            | 15        | 34.9       |
| HBV                   | Negative       | 11        | 23.9       |
|                       | Postive        | 35        | 76.1       |
| AFP                   | Low            | 18        | 41.9       |
|                       | (<upper limit) |           |            |
|                       | High           | 25        | 58.1       |
| Differentiation level | (≥upper limit) |           |            |
|                       | High           | 17        | 39.5       |
| CEA                   | Low            | 26        | 60.5       |
|                       | Negative       | 8         | 40.0       |
| GPC-3                 | Postive        | 12        | 60.0       |
|                       | Negative       | 7         | 21.2       |
|                       | Postive        | 26        | 78.8       |

T, tumor; HBV, hepatitis B virus; AFP,  $\alpha$ -fetoprotein; CEA, carcino-embryonic antigen; GPC-3, glypican-3.
